# Supplementary material for: Long-lived keratin 15+ esophageal progenitor cells contribute to homeostasis and regeneration
Source: JCI journal article supplement (doi:10.1172/jci88941), 2017-05-07
Supplement: sd1 [file 1]

**Supplemental Data**

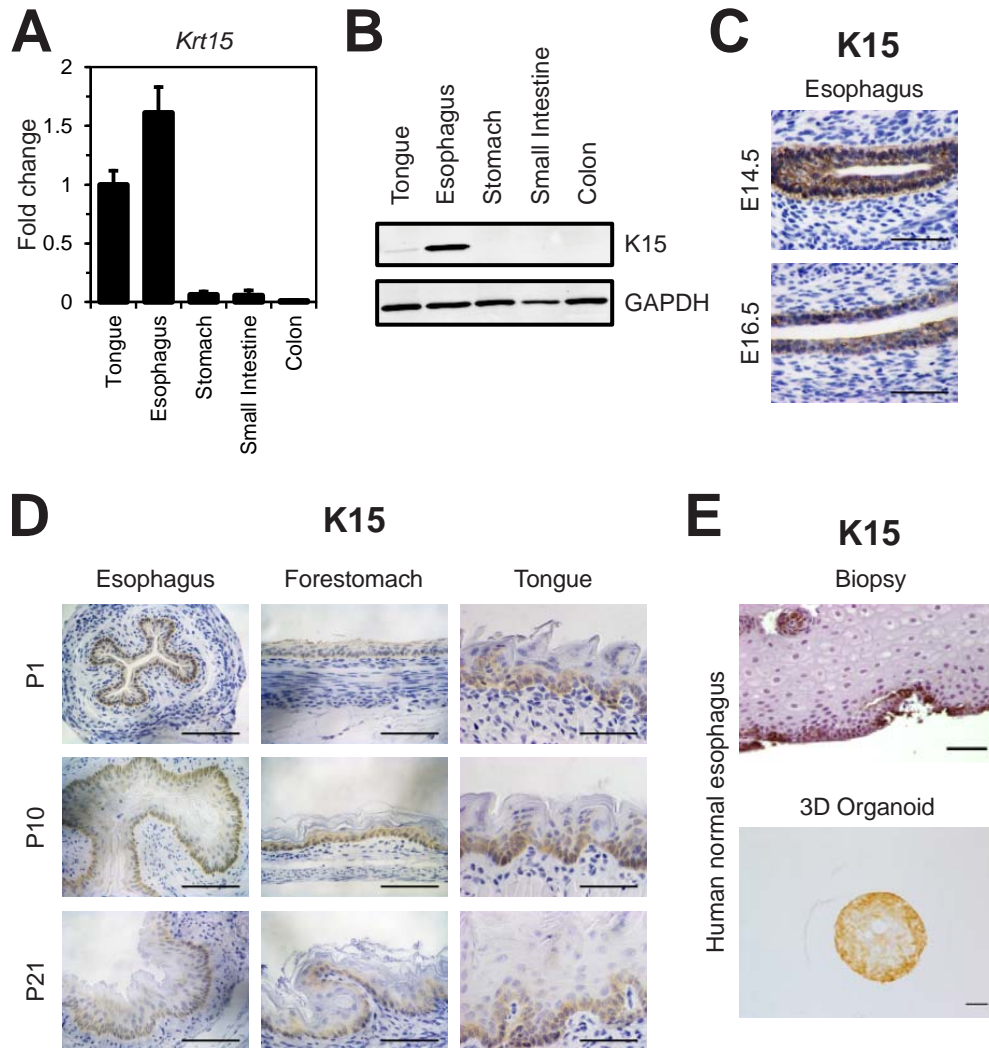

**Figure S1: K15 is expressed in the esophagus of embryo and newborn mice**

(A) qPCR for *Krt15* mRNA expression in several digestive tract tissues. Graph represents mean  $\pm$  SEM (n=4). (B) Western Blot for K15 in mouse digestive tissues. (C) Immunohistochemistry for K15 in mouse embryonic esophagus (E14.5 and E16.5). (D) Immunohistochemistry for K15 in the esophagus, forestomach and tongue of newborn mice (P1, P10 and P21). (E) Immunohistochemistry for K15 in normal human esophagus and 3D organoids derived from normal human esophagus biopsies. Scale bar = 50 $\mu$ m.

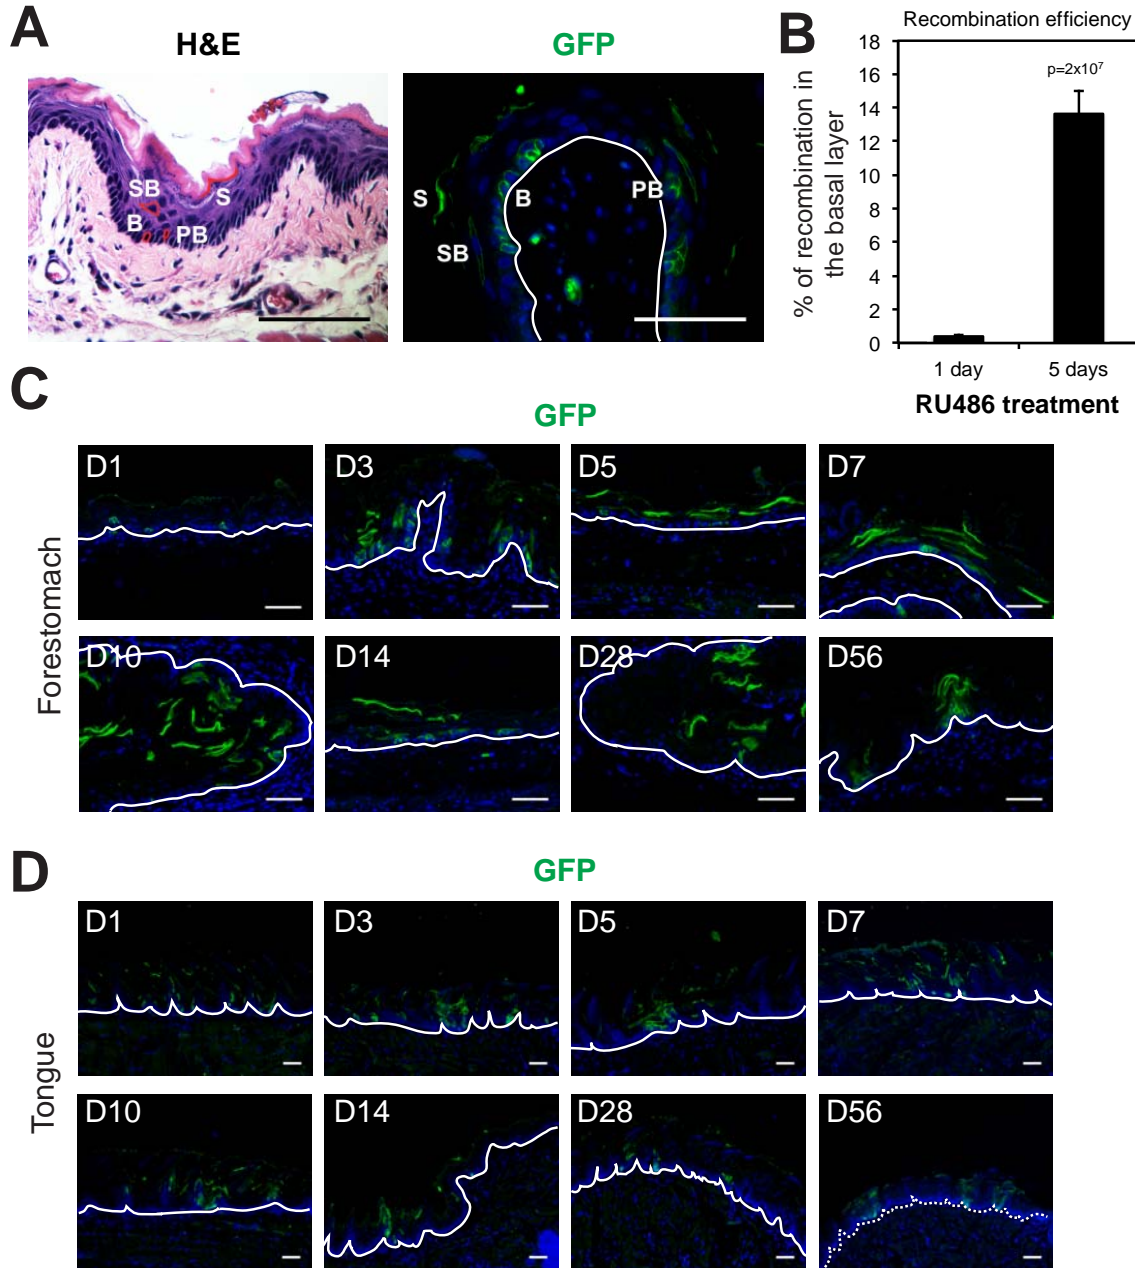

**Figure S2: *Krt15* marks long-lived cells in the mouse forestomach and tongue**

(A) Localization of basal [B], parabasal [PB], suprabasal [SB] and superficial [S] cells in normal esophagus as well as in an example of lineage-tracing experiment in *Krt15-CrePR1;R26<sup>mT/mG</sup>* mice. (B) *Krt15-CrePR1;R26<sup>mT/mG</sup>* mice were injected daily with 0.5mg RU486 to induce Cre recombination for 1 or 5 consecutive days and sacrificed one day following the last RU486 injection. Percentage of GFP+ cells in the basal layer was assessed. Graph represents mean  $\pm$  SEM (n=4). (C-D) *Krt15-CrePR1;R26<sup>mT/mG</sup>* mice were injected daily with 0.5mg RU486 for 5 consecutive days and sacrificed at different time points. GFP (*Krt15*-derived cells) immunofluorescence in the forestomach (C) and the tongue (D). Dotted line marks the basement membrane. Scale bar = 50 $\mu$ m.

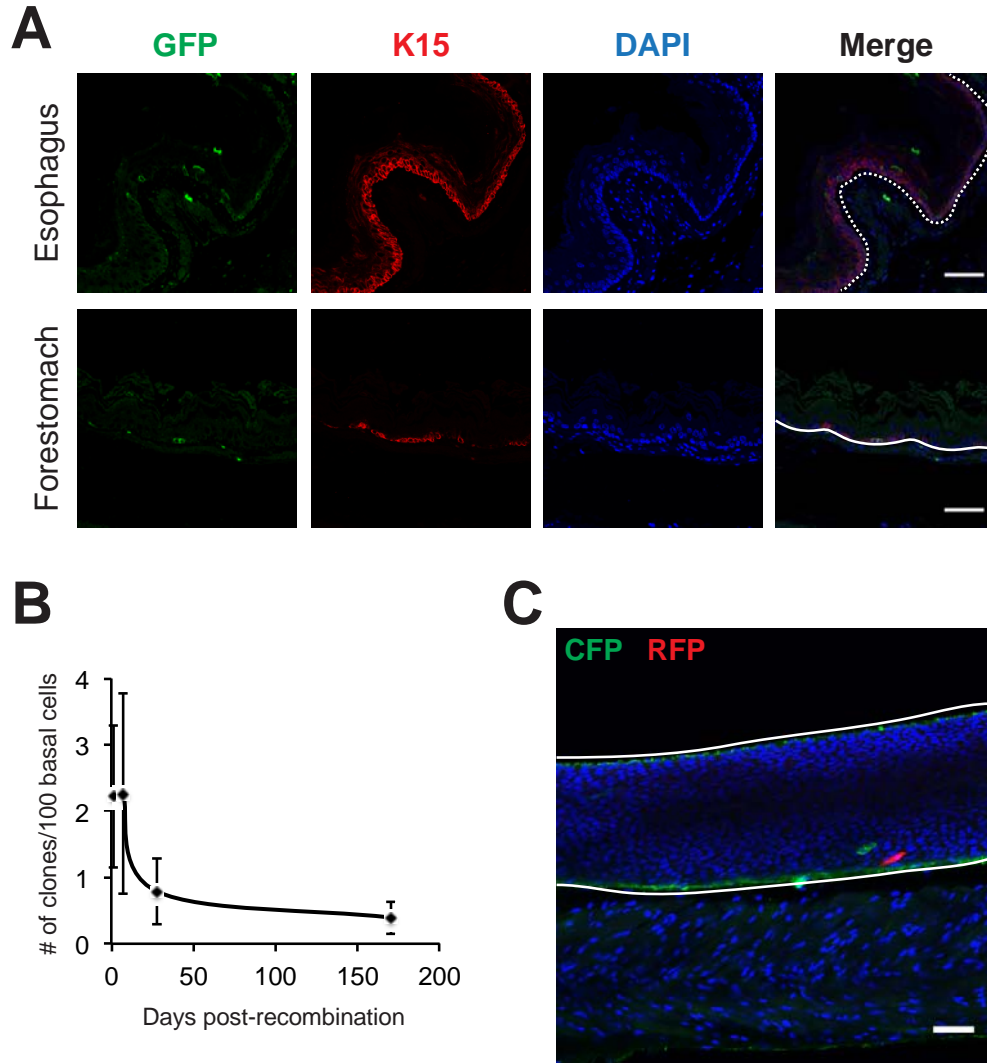

**Figure S3: *Krt15*<sup>+</sup> clones are maintained up to 6 months**

(A) *Krt15-CrePR1;R26<sup>mT/mG</sup>* mice were injected daily with 0.5mg RU486 for five consecutive days and sacrificed one day after the last RU486 injection. Immunofluorescence for GFP (*Krt15*-derived cells) and K15 in esophagi. (B) *Krt15-CrePR1;R26<sup>mT/mG</sup>* mice were injected daily with 0.5mg RU486 for five consecutive days and sacrificed at different time points. Number of GFP clones was counted. Graph represents mean  $\pm$  SD (n=4-5 mice/group, cross-sections of 4 different regions of the esophagus were analyzed for each mouse). Statistical significance was determined by the Wald chi-square test ( $X^2(3)=106.28$ ,  $p<0.0001$ ). (C) *Krt15-CrePR1;R26<sup>Conf</sup>* mice were injected every 12 hours with 1mg of RU486 for 10 consecutive days and sacrificed 2 months later. Confocal microscopy of one CFP clone and one RFP clone.

Dotted line marks the basement membrane. Scale bar = 50 $\mu$ m.

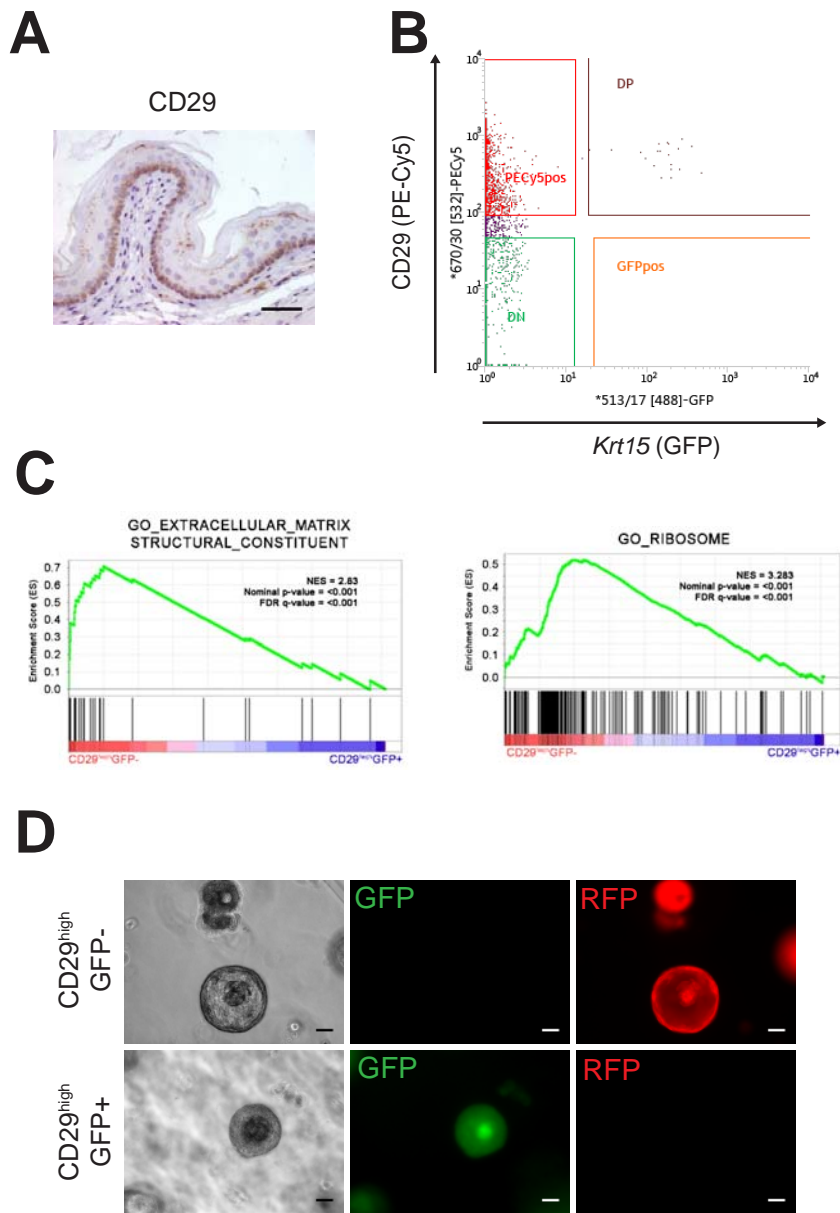

**Figure S4: *Krt15*<sup>-</sup> cells are enriched for ECM constituents and ribosome gene sets**

(A) CD29 immunohistochemistry in WT mouse esophagus. (B-D) *Krt15*-*CrePR1*;*R26mT/mG* mice were injected once with 0.5mg RU486 and sacrificed 24h later. CD29<sup>high</sup>GFP+ (*Krt15*<sup>+</sup> basal cells) and CD29<sup>high</sup>GFP- (*Krt15*<sup>-</sup> basal cells) cells were sorted. (C) Transcriptional profiles of both cell populations were determined by RNA-seq. Plots for two of the gene sets enriched in *Krt15*<sup>-</sup> basal cells. (D) GFP and Tomato detection in CD29<sup>high</sup>GFP- and CD29<sup>high</sup>GFP+ cells-derived organoids. Scale bar = 50µm.

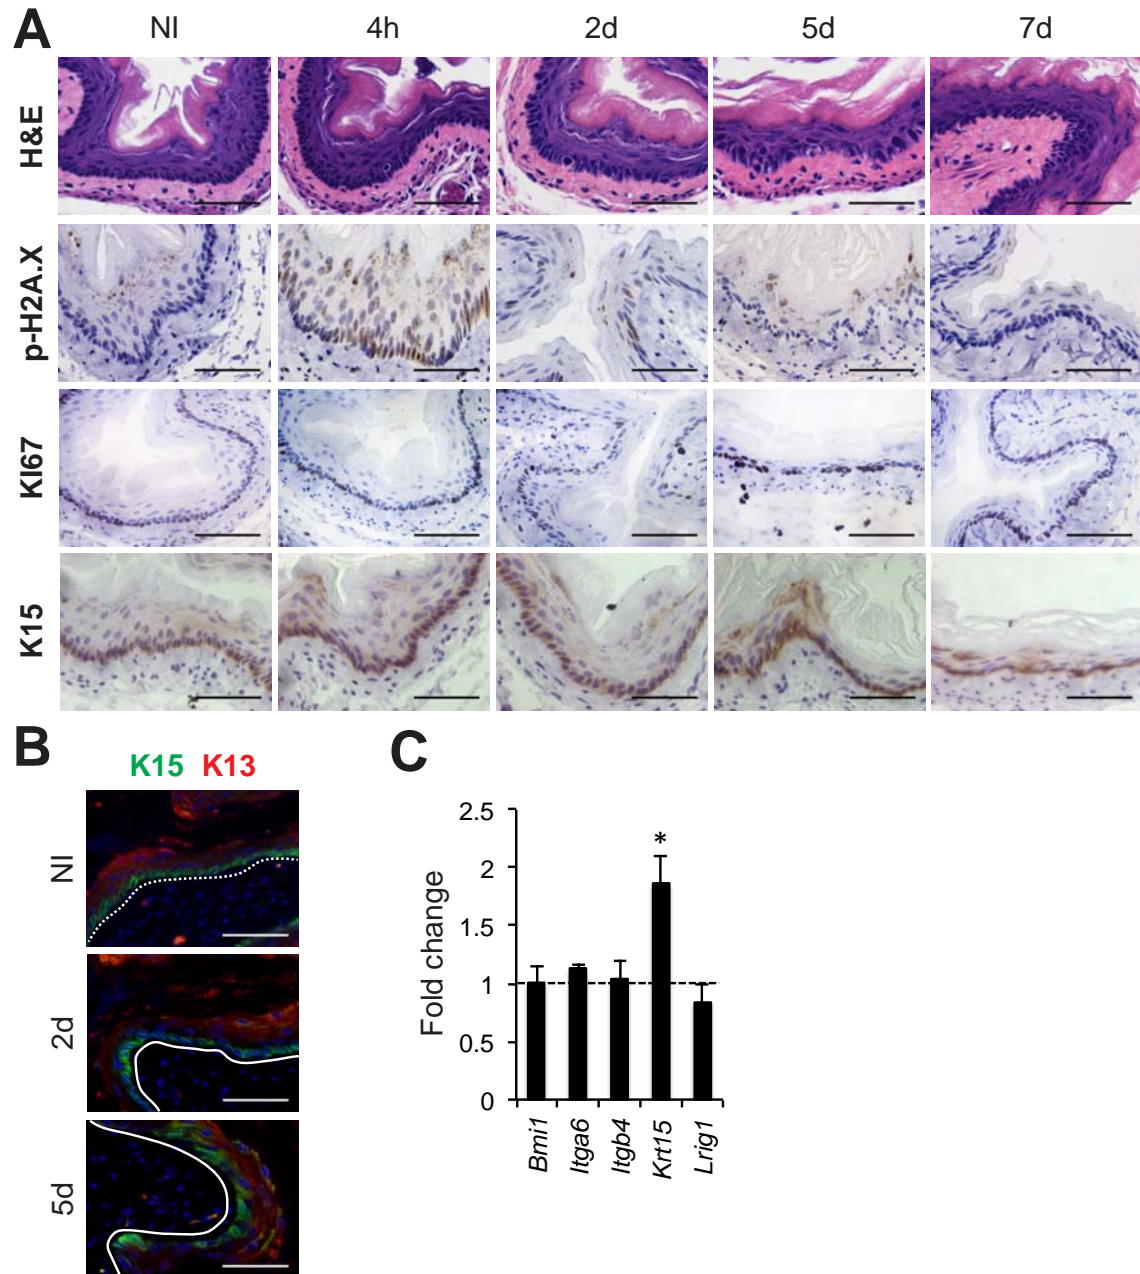

**Figure S5: K15 is mislocalized following irradiation**

(A-B) C57BL/J6 WT mice were subjected to 12 Gy whole-body irradiation and sacrificed 4h, 2d, 5d and 7d following irradiation (A) H&E and immunohistochemistry for p-H2A.X, KI67 and K15 in the esophagi of non-irradiated (NI) and irradiated mice. (B) Colocalization of K15 and K13 in the esophagi of non-irradiated (NI) and irradiated mice. (C) Organoids-derived from C57BL/J6 WT mice were submitted to 4 Gy irradiation 24h after seeding and harvested 7d later. Graph represents relative gene expression between irradiated and non-irradiated 3D organoids (mean  $\pm$  SEM, n=3, \*represents  $p \leq 0.05$  vs. non-irradiated). Dotted line indicates the basement membrane. Scale bar = 50 $\mu$ m.

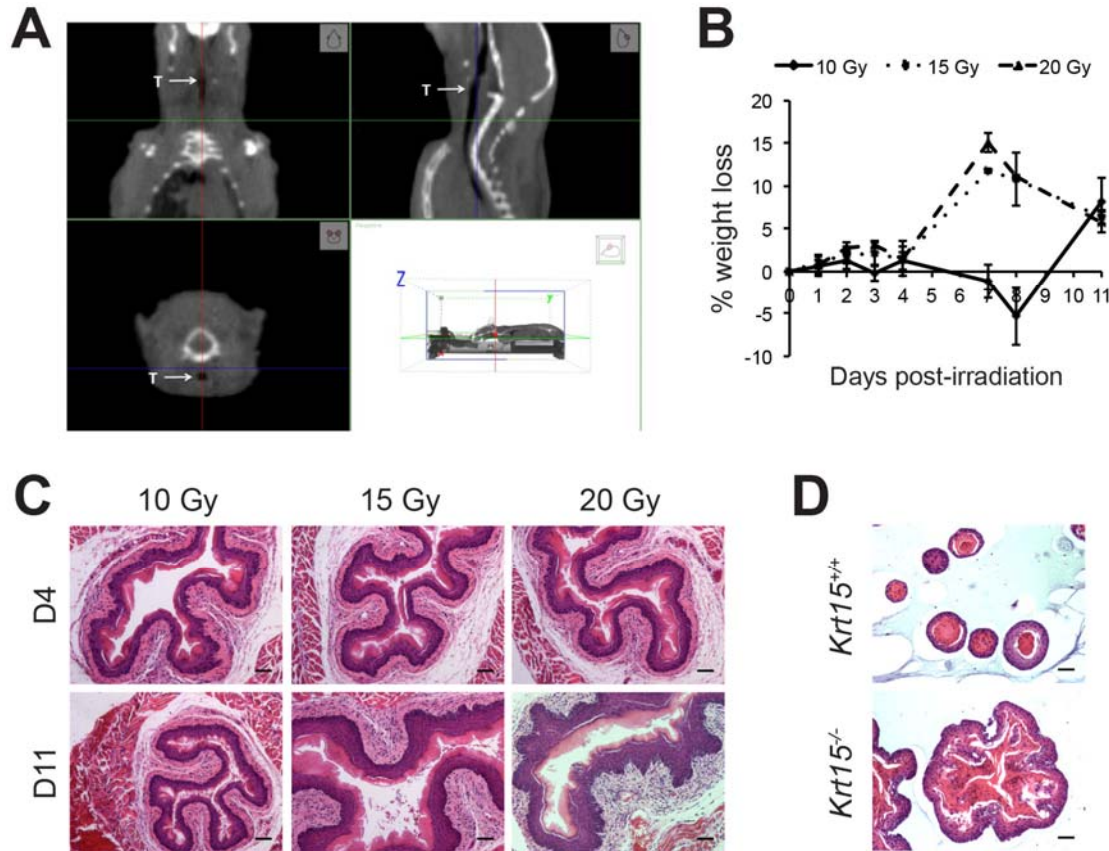

**Figure S5: Esophageal-targeted irradiation**

(A) Esophagi were locally irradiated in mice. Following CT scanning, isocenter was determined using MuriSlice Software. Esophagi of the mice were then irradiated at the isocenter using a 3x12mm collimator at a 90° angle. T indicates the trachea. (B-C) Esophagi of C57BL/6 WT mice were locally irradiated with 10, 15 or 20 Gy and mice were sacrificed 4 or 11 days following irradiation. (B) Weight loss was assessed. Graph represents mean  $\pm$  SEM (n=4 mice/dose). (C) H&E staining of irradiated mice with 10, 15 or 20 Gy of esophagus-targeted radiation and sacrificed at D4 or D11 following radiation. (D) *Krt15*<sup>+/+</sup> and *Krt15*<sup>-/-</sup> mice were subjected to esophagus-targeted 20 Gy irradiation and sacrificed 15 days following radiation. H&E staining of 3D organoids grown from esophageal epithelial cells isolated from those mice. Scale bar = 50 $\mu$ m.

**Table S1: Up-regulated genes in *Krt15*+ basal cells vs. *Krt15*- basal cells**

| Gene ID        | Gene Full Name                                                             | Fold Change (log2) | p-value (adj) |
|----------------|----------------------------------------------------------------------------|--------------------|---------------|
| Msh2           | MutS Homolog of, 2                                                         | 9.23               | 6.3E-07       |
| Slc12a2        | Solute Carrier Family 12 (Sodium/Potassium/Chloride Transporter), Member 2 | 8.63               | 1.4E-05       |
| Ascl2          | Achaete-Scute Complex, Drosophila, Homolog of, 2                           | 8.55               | 5.8E-06       |
| Sh3bp4         | SH3 domain-binding protein 4                                               | 8.39               | 3.2E-05       |
| Sectm1b        | Secreted and Transmembrane 1                                               | 8.01               | 0.0002        |
| Zcchc14        | Zinc Finger CCHC Domain-containing protein 14                              | 7.97               | 0.0001        |
| Btbd11         | BTB/POZ domain-containing Protein 11                                       | 7.97               | 0.0002        |
| Orc5           | Origin Recognition Complex, Subunit 5, Sc. Cerevisiae, Homolog of          | 7.83               | 0.00009       |
| Zfp868         | Zinc Finger Protein 868                                                    | 7.77               | 0.0004        |
| Rad51b         | Rad51, S. Cerevisiae, Homolog of, B                                        | 7.77               | 0.0004        |
| Nup133         | Nucleoporin, 133-KD                                                        | 7.75               | 0.0004        |
| Zufsp          | Zinc Finger With UFM1 Specific Peptidase Domain                            | 7.74               | 0.0004        |
| Ubr3           | Ubiquitin Protein Ligase E3 Component N-Recognin 3                         | 7.65               | 0.0002        |
| Pds5a          | PDS5 Cohesion Associated Factor A                                          | 7.62               | 0.0006        |
| Epha2          | Ephrin Receptor EphA2                                                      | 7.61               | 0.0001        |
| Slc30a4        | Solute Carrier Family 30 Member 4                                          | 7.59               | 0.0006        |
| Gripap1        | GRIP1-associated protein 1                                                 | 7.59               | 0.0003        |
| A830080D01 Rik |                                                                            | 7.56               | 0.0007        |
| Cnksr3         | Connector Enhancer Of KSR 3                                                | 7.43               | 0.001         |
| Amer1          | APC Membrane Recruitment Protein 1                                         | 7.36               | 0.001         |
| Sgcb           | Sarcoglycan Beta                                                           | 7.32               | 0.001         |
| Foxj3          | Forkhead Box J3                                                            | 7.26               | 0.002         |
| Dgkd           | Diacylglycerol Kinase Delta                                                | 7.24               | 0.0007        |
| E230016M11 Rik |                                                                            | 7.23               | 0.002         |
| Parg           | Poly(ADP-Ribose) Glycohydrolase                                            | 7.17               | 0.0001        |
| Acer2          | Alkaline Ceramidase 2                                                      | 7.13               | 0.003         |
| Srfbp1         | Serum Response Factor Binding Protein 1                                    | 7.10               | 0.003         |
| 2810001G20Rik  |                                                                            | 7.09               | 0.004         |
| Zfp422         | Zinc Finger Protein 22                                                     | 7.03               | 0.003         |
| D730001G18 Rik |                                                                            | 7.00               | 0.004         |
| Pwp2           | PWP2 Periodic Tryptophan Protein Homolog                                   | 6.98               | 0.002         |
| Trappc9        | Trafficking Protein Particle Complex 9                                     | 6.97               | 0.004         |
| Rdh10          | Retinol Dehydrogenase 10                                                   | 6.96               | 0.005         |
| Zfp746         | Zinc Finger Protein 746                                                    | 6.95               | 0.005         |
| Slc19a2        | Solute Carrier Family 19 Member 2                                          | 6.95               | 0.006         |

|                   |                                                      |      |       |
|-------------------|------------------------------------------------------|------|-------|
| Tnc               | Tenascin C                                           | 6.94 | 0.004 |
| Zbtb40            | Zinc Finger And BTB Domain Containing 40             | 6.85 | 0.006 |
| MARCH8            | Membrane Associated Ring-CH-Type Finger 8            | 6.78 | 0.007 |
| Hmgxb4            | HMG-Box Containing 4                                 | 6.76 | 0.007 |
| Epb4.115          | Erythrocyte Membrane Protein Band 4.1 Like 5         | 6.76 | 0.002 |
| Pla2g7            | Phospholipase A2 Group VII                           | 6.73 | 0.007 |
| Ust               | Uronyl 2-Sulfotransferase                            | 6.68 | 0.01  |
| Lrrc8d            | Leucine Rich Repeat Containing 8 Family Member D     | 6.62 | 0.01  |
| Atmin             | ATM Interactor                                       | 6.61 | 0.003 |
| 1700019D03R<br>ik |                                                      | 6.61 | 0.01  |
| Arhgef19          | Rho Guanine Nucleotide Exchange Factor 19            | 6.57 | 0.01  |
| Aplf              | Aprataxin And PNKP Like Factor                       | 6.57 | 0.01  |
| Zer1              | Zyg-11 Related Cell Cycle Regulator                  | 6.53 | 0.01  |
| Katnal1           | Katanin Catalytic Subunit A1 Like 1                  | 6.51 | 0.005 |
| B4galt7           | Beta-1,4-Galactosyltransferase 7                     | 6.48 | 0.01  |
| Ermard            | ER Membrane Associated RNA Degradation               | 6.46 | 0.01  |
| Mxd1              | Max Dimerization Protein 1                           | 6.44 | 0.01  |
| Slc25a27          | Solute Carrier Family 25 Member 27                   | 6.42 | 0.01  |
| F2r               | Coagulation Factor II Receptor                       | 6.41 | 0.02  |
| Cep350            | Centrosomal Protein 350                              | 6.41 | 0.02  |
| Mboat2            | Membrane Bound O-Acyltransferase Domain Containing 2 | 6.41 | 0.02  |
| Tmem8             | Transmembrane 8                                      | 6.41 | 0.02  |
| Ythdc2            | YTH domain-containing protein 2                      | 6.40 | 0.02  |
| Gtf2ird2          | GTF2I Repeat Domain Containing 2                     | 6.40 | 0.02  |
| Serac1            | Serine Active Site Containing 1                      | 6.39 | 0.02  |
| 6030458C11R<br>ik |                                                      | 6.37 | 0.02  |
| Casd1             | CAS1 Domain Containing 1                             | 6.37 | 0.01  |
| Zfp52             | Zinc Finger Protein 52                               | 6.36 | 0.02  |
| Efcab1            | EF-Hand Calcium Binding Domain 1                     | 6.35 | 0.02  |
| Ccdc125           | Coiled-Coil Domain Containing 125                    | 6.34 | 0.02  |
| Mdm4              | Mouse Double Minute 4 Homolog                        | 6.34 | 0.01  |
| Tecpr2            | Tectonin Beta-Propeller Repeat Containing 2          | 6.33 | 0.02  |
| Rbm48             | RNA Binding Motif Protein 48                         | 6.32 | 0.02  |
| Fbxo42            | F-Box only protein 42                                | 6.26 | 0.01  |
| 2410131K14R<br>ik |                                                      | 6.26 | 0.01  |
| Stk3              | Serine/Threonine Kinase 3                            | 6.23 | 0.02  |
| Myh10             | Myosin Heavy Chain 10                                | 6.22 | 0.00  |
| Rlf               | Rearranged L-Myc Fusion                              | 6.19 | 0.01  |
| Wdr91             | WD Repeat Domain 91                                  | 6.19 | 0.03  |
| Ttc21b            | Tetratricopeptide Repeat Domain 21B                  | 6.19 | 0.02  |

|               |                                                              |      |       |
|---------------|--------------------------------------------------------------|------|-------|
| Brms1l        | Breast Cancer Metastasis-Suppressor 1-Like                   | 6.18 | 0.02  |
| Dsg2          | Desmoglein 2                                                 | 6.18 | 0.01  |
| Ttc26         | Tetratricopeptide Repeat Domain 26                           | 6.14 | 0.03  |
| Zfp407        | Zinc Finger Protein 407                                      | 6.09 | 0.03  |
| Nek1          | NIMA Related Kinase 1                                        | 6.09 | 0.01  |
| 9230114K14Rik |                                                              | 6.05 | 0.03  |
| Ch25h         | Cholesterol 25-Hydroxylase                                   | 6.04 | 0.04  |
| Aox4          |                                                              | 6.04 | 0.04  |
| Dapp1         | Dual Adaptor Of Phosphotyrosine And 3-Phosphoinositides 1    | 6.03 | 0.02  |
| Asap3         | ArfGAP With SH3 Domain, Ankyrin Repeat And PH Domain 3       | 5.99 | 0.04  |
| Fzd8          | Frizzled 8                                                   | 5.90 | 0.04  |
| AI607873      |                                                              | 5.90 | 0.05  |
| Flrt2         | Fibronectin Leucine Rich Transmembrane Protein 2             | 5.89 | 0.03  |
| Sirpa         | Signal Regulatory Protein Alpha                              | 5.88 | 0.05  |
| Tbc1d16       | TBC1 Domain Family Member 16                                 | 5.86 | 0.05  |
| D930016D06Rik |                                                              | 5.86 | 0.02  |
| Apcdd1        | Apc, downregulated by, 1                                     | 5.83 | 0.05  |
| Arrdc2        | Arrestin Domain Containing 2                                 | 5.82 | 0.04  |
| Atp7a         | ATPase Copper Transporting Alpha                             | 5.80 | 0.02  |
| Slc22a4       | Solute Carrier Family 22 Member 4                            | 5.80 | 0.02  |
| Gadd45a       | Growth arrest- and DNA damage-inducible Gene, 45 alpha       | 5.79 | 0.01  |
| Ptbp2         | Polypyrimidine Tract Binding Protein 2                       | 5.77 | 0.04  |
| Ovo2          | Ovo-like 2                                                   | 5.72 | 0.01  |
| Mkl1          | Megakaryoblastic Leukemia (Translocation) 1                  | 5.51 | 0.04  |
| Synj1         | Synaptojanin 1                                               | 5.45 | 0.04  |
| Dhx38         | DEAH-Box Helicase 38                                         | 5.44 | 0.03  |
| Wdr11         | WD Repeat Domain 11                                          | 5.42 | 0.02  |
| Ranbp9        | RAN Binding Protein 9                                        | 5.30 | 0.01  |
| Ltn1          | Listerin E3 Ubiquitin Protein Ligase 1                       | 5.29 | 0.02  |
| Ephb4         | EPH Receptor B4                                              | 5.29 | 0.04  |
| Zbtb21        | Zinc Finger And BTB Domain Containing 21                     | 5.22 | 0.04  |
| Srrt          | Serrate, RNA Effector Molecule                               | 5.14 | 0.02  |
| Akap11        | A-Kinase Anchoring Protein 11                                | 5.03 | 0.05  |
| Smim1         | Small Integral Membrane Protein 1                            | 5.01 | 0.01  |
| Eps15l1       | Epidermal Growth Factor Receptor Pathway Substrate 15 Like 1 | 5.00 | 0.04  |
| Polr2a        | RNA Polymerase II Subunit A                                  | 4.87 | 0.04  |
| Nf2           | Neurofibromin 2                                              | 4.86 | 0.047 |
| Nfat5         | Nuclear Factor Of Activated T-Cells 5                        | 4.72 | 0.047 |
| Arhgap12      | Rho GTPase Activating Protein 12                             | 4.53 | 0.047 |

|       |                                          |      |       |
|-------|------------------------------------------|------|-------|
| Prpf8 | Pre-mRNA Processing Factor 8             | 4.51 | 0.049 |
| Cnot1 | CCR4-NOT Transcription Complex Subunit 1 | 4.24 | 0.047 |

**Table S2: Down-regulated genes in *Krt15*+ basal cells vs. *Krt15*- basal cells**

| Gene ID  | Gene Full Name                                      | Fold Change (log2) | p-value (adj) |
|----------|-----------------------------------------------------|--------------------|---------------|
| Col3a1   | Collagen Type III Alpha 1 Chain                     | -10.09             | 1.77E-10      |
| Fxyd1    | FXYD Domain Containing Ion Transport Regulator 1    | -10.09             | 2.74E-08      |
| Mfap5    | Microfibrillar Associated Protein 5                 | -10.04             | 3.54E-10      |
| Dpt      | Dermatopontin                                       | -9.60              | 1.46E-08      |
| Cd302    | CD302 Molecule                                      | -9.31              | 1.14E-07      |
| Col1a1   | Collagen Type I Alpha 1 Chain                       | -9.08              | 5.41E-06      |
| Saa3     | Serum Amyloid A3 Pseudogene                         | -9.03              | 7.85E-06      |
| Col1a2   | Collagen Type I Alpha 2 Chain                       | -9.03              | 5.80E-06      |
| Ctla2a   | Cytotoxic T lymphocyte-associated protein 2 complex | -9.00              | 1.46E-05      |
| Bgn      | Biglycan                                            | -8.65              | 4.42E-05      |
| Sparcl1  | SPARC Like 1                                        | -8.21              | 0.0002        |
| Ccl7     | C-C Motif Chemokine Ligand 7                        | -8.04              | 0.0004        |
| Rgs1     | Regulator Of G-Protein Signaling 1                  | -7.90              | 0.0004        |
| Serpinf1 | Serpin Family F Member 1                            | -7.75              | 0.0004        |
| Inmt     | Indolethylamine N-Methyltransferase                 | -7.66              | 0.001         |
| Pi16     | Peptidase Inhibitor 16                              | -7.47              | 0.0001        |
| Slit3    | Slit Guidance Ligand 3                              | -7.46              | 0.001         |
| Lims2    | LIM Zinc Finger Domain Containing 2                 | -7.44              | 0.001         |
| Bcl2l11  | BCL2 Like 11                                        | -7.36              | 0.002         |
| Aspn     | Asporin                                             | -7.33              | 0.001         |
| Nid1     | Nidogen1                                            | -7.32              | 0.001         |
| Tnxb     | Tenascin XB                                         | -7.31              | 0.001         |
| Col5a1   | Collagen Type V Alpha 1 Chain                       | -7.27              | 0.002         |
| Fbln2    | Fibulin2                                            | -7.25              | 0.0004        |
| Lum      | Lumican                                             | -7.23              | 0.003         |
| Cd37     | CD37 Molecule                                       | -6.96              | 0.003         |
| Olfml2b  | Olfactomedin Like 2B                                | -6.90              | 0.007         |
| Cd34     | CD34 Molecule                                       | -6.89              | 0.007         |
| Jam3     | Junctional Adhesion Molecule 3                      | -6.87              | 0.005         |
| Abca8a   | ATP binding cassette Subfamily A Member 10          | -6.86              | 0.006         |
| Scara5   | Scavenger Receptor Class A Member 5                 | -6.69              | 0.01          |
| Clec3b   | C-Type Lectin Domain Family 3 Member B              | -6.63              | 0.01          |
| Lrrc17   | Leucine Rich Repeat Containing 17                   | -6.52              | 0.01          |
| Ace2     | Angiotensin I Converting Enzyme 2                   | -6.42              | 0.02          |
| Rhoj     | Ras Homolog Family Member J                         | -6.41              | 0.02          |
| Dmtn     | Dematin Actin Binding Protein                       | -6.37              | 0.02          |
| Gpr133   | Adhesion G Protein-Coupled Receptor D1              | -6.17              | 0.03          |
| Fbn1     | Fibrillin1                                          | -6.15              | 0.01          |
| Sod3     | Superoxide Dismutase 3, extracellular               | -6.14              | 0.03          |

|          |                                                              |       |       |
|----------|--------------------------------------------------------------|-------|-------|
| Postn    | Periostin                                                    | -6.14 | 0.03  |
| Lrrc32   | Leucine Rich Repeat Containing 32                            | -6.13 | 0.03  |
| Flt3l    | Fms Related Tyrosine Kinase 3 Ligand                         | -6.09 | 0.03  |
| Ptgis    | Prostaglandin I2 (Prostacyclin) Synthase                     | -6.01 | 0.04  |
| Ldlrad4  | Low Density Lipoprotein Receptor Class A Domain Containing 4 | -5.98 | 0.04  |
| Igfbp6   | Insulin Like Growth Factor Binding Protein 6                 | -5.85 | 0.004 |
| Trappc12 | Trafficking Protein Particle Complex 12                      | -5.21 | 0.03  |
| Rarres2  | Retinoic Acid Receptor Responder 2                           | -5.02 | 0.03  |
| Ttc39c   | Tetratricopeptide Repeat Domain 39C                          | -4.54 | 0.04  |

## Supplemental Methods

### *Animal studies*

*Krt15-CrePR1* mice were bred with *R26<sup>mT/mG</sup>* mice and 6-week old progeny mice were used for lineage tracing experiments. Cre recombination was induced in *Krt15-CrePR1;R26<sup>mT/mG</sup>* mice by intraperitoneal (IP) injections of 0.5 mg of RU486 (Sigma-Aldrich). RU486 was dissolved in ethanol and then diluted in peanut oil. RU486 was administered daily for five continuous days except if mentioned otherwise and mice were then sacrificed at different time points (n=4-7 for each time point).

*Krt15-CrePR1* mice were bred with *R26<sup>Conf</sup>* mice and 6-week old progeny mice were used for lineage tracing experiments. Cre recombination was induced in *Krt15-CrePR1;R26<sup>Conf</sup>* mice by IP injections of 1 mg of RU486 every 12 hours for ten continuous days and mice were then sacrificed at different time points (n=6-8 for each time point). Tissues were fixed in 4% PFA for 1 hr. and then incubated overnight in 30% sucrose before embedding in OCT compound.

*Krt15-CrePR1* mice were bred with *R26<sup>iDTR</sup>* and 6-week old progeny mice were used for *Krt15+* cell ablation experiments. Cre recombination was induced in *Krt15-CrePR1;R26<sup>iDTR</sup>* mice by IP injection of 0.5 mg of RU486 and DTR activation was induced by IP injection of 1 µg *Diphtheria Toxin* (DT, Sigma-Aldrich) diluted in PBS. Mice were administered RU486 daily for five continuous days followed by a single DT injection the following day. Mice were then sacrificed 12 days following DT injection (n=5 mice/group).

When experimental mice were sacrificed, they were generally injected with BrdU IP (0.1mg/g body weight) 1.5 hrs. prior to sacrifice to mark proliferative cells. Except if mentioned otherwise, esophagus, forestomach and tongue were removed and fixed in Zinc Formalin.

For each mouse, esophagi were cut in 4 pieces and embedded such that upon slide sectioning, we would obtain transverse planes of 4 different regions of the esophagi to control for regional differences.

### *Vibratome sectioning and Confocal Imaging*

Tissue was embedded in 4% low melt agarose and 100µm thick cross sections were cut with a vibratome (Leica VT1000S). Sections were stained with anti-GFP (Abcam) and/or anti-RFP (Abcam) diluted 1:200 in PBS 5% BSA 0.1% Triton overnight. Sections were then incubated with secondary antibodies and DAPI. Confocal imaging was performed on a Leica SP8 confocal microscope with a 20X dry or 40X water objective. Application Suit (Leica) and Imaris software were used for image processing.

### *Esophageal epithelial cell isolation*

Primary esophageal epithelial cells were cultured and maintained as described previously (Kalabis et al. 2012). Briefly, the esophagus was digested in Dispase I (BD Biosciences). Epithelial sheets were peeled and dissociated in 0.05% Trypsin-EDTA. Trypsinization was stopped using soybean trypsin inhibitor and epithelial cells were then filtered through a 40-µm cell strainer. Primary esophageal epithelial cells were expanded in Keratinocyte-serum free medium (KSFM) without CaCl<sub>2</sub> and supplemented with 0.018mM CaCl<sub>2</sub>, 50ug/ml bovine pituitary extract, 5 ng/ml human recombinant EGF, 5 µg/ml gentamicin sulfate, 0.2% Fungizone® Antimycotic and penicillin-streptomycin.

### *EdU detection by Flow cytometry*

*Krt15-CrePR1;R26<sup>mT/mG</sup>* mice were injected with 0.5mg of RU486 and sacrificed 24 or 48 hrs. following Cre recombination (n=4 mice/group). Before sacrifice, mice were injected IP with EdU (20mg/kg body weight). Esophagi were harvested and epithelial cells were isolated as described above. Cells were stained for EdU using Click-iT® Plus EdU Alexa Fluor® 647 Flow Cytometry Assay Kit (ThermoFisher Scientific) according to manufacturer's instructions. Cells were also stained with CD29-PE-Cy5 as described above. Percentage of EdU+ cells in *Krt15+* and *Krt15-* basal cell populations was determined by flow cytometry.

### *Immunohistochemistry and immunofluorescence*

Immunohistochemical (IHC) staining was performed as described previously (Long et al. 2015). Briefly, zinc formalin-fixed paraffin-embedded tissues were sectioned (6µm). Antigen retrieval was performed by

pressure cooking using citric acid pH6.0 buffer. For IHC, peroxidases were quenched with peroxide prior to blocking with avidin, biotin and blocking buffer at room temperature. Primary antibodies were incubated overnight at 4°C. Slides were then incubated with biotinylated antibodies for 30 min at 37°C and then with ABC Reagent (Vector Laboratories) for an additional 30 min at 37°C. Finally, slides were treated with DAB substrate and counterstained with hematoxylin. For immunofluorescence (IF), sections were blocked using blocking solution (PBS 1% BSA 0.3% Triton 5% serum) for 1h at room temperature and incubated with primary antibodies overnight at 4°C. Sections were then incubated with secondary antibodies for 1 hr. at room temperature and counterstained with DAPI. For GFP immunofluorescence, TSA® Amplification signal kit (Perkin-Elmer) was used according to the manufacturer's instructions. Antibodies used are as follows:

**Table : Antibodies for IHC and IF**

| PROTEIN       | SPECIES | DILUTION | CATALOG # | SUPPLIER            |
|---------------|---------|----------|-----------|---------------------|
| BrdU          | Mouse   | 1:100    | 5292      | Cell Signaling      |
| E-CADHERIN    | Rabbit  | 1:200    | 3195      | Cell Signaling      |
| GFP           | Goat    | 1:200    | ab6673    | Abcam               |
| Phospho-H2A.X | Rabbit  | 1:200    | 9718      | Cell Signaling      |
| KI67          | Rabbit  | 1:200    | ab16667   | Abcam               |
| K13           | Mouse   | 1:200    | sc-58721  | Santa Cruz          |
| K15           | Rabbit  | 1:400    | ab52816   | Abcam               |
| K15           | Mouse   | 1:100    | VP-C411   | Vector Laboratories |
| p63           | Mouse   | 1:200    | sc-8431   | Santa Cruz          |

#### *RNA Extraction and qPCR*

Total RNA was extracted from cells or tissues using the GeneJET™ RNA Purification Kit (Thermo Scientific) or from sorted cells using RNAqueous®-Micro Kit (Ambion) following the manufacturer's recommendations. RNA was then reverse transcribed with oligo-dT primers using the Taqman® Reverse Transcription Kit (Invitrogen) following the manufacturer's recommendations. QPCR was performed with Power SYBR® Green PCR Master Mix (Applied Biosystems) using the StepOnePlus™ Real-Time PCR System (Applied Biosystems). Primer sequences are listed in Supplemental Table S2.

**Table : QPCR Primer Sequences**

| GENE         | SPECIES | FORWARD                  | REVERSE                |
|--------------|---------|--------------------------|------------------------|
| <i>Bmi1</i>  | Mouse   | CCAGACCACTCCTGAACATAAG   | CTTCTCCTCGGTCTTCATTGG  |
| <i>Cd34</i>  | Mouse   | TGGGCACCACTGGTTATTT      | GAGGAGAGCACAAAGGAAGTAG |
| <i>Cd71</i>  | Mouse   | CTCGGCAAGTAGATGGAGATAAC  | CGCTTACAATAGCCCAGGTAG  |
| <i>Cd73</i>  | Mouse   | GACACTCCAACACCTTTCTCTAC  | CATCATCTGCGGTGACTATGAA |
| <i>Gapdh</i> | Mouse   | GGGTGTGAACCACGAGAAATA    | AGTGATGGCATGGACTGTG    |
| <i>Itga6</i> | Mouse   | GCTTCCTCGTTTGGCTATGA     | TCGAGTCTTTGGTCCCATTTAG |
| <i>Itgb1</i> | Mouse   | GACAGTGTGTGTGTAGGAAGAG   | ACTGCCAGTGTAATTGGGATAG |
| <i>Itgb4</i> | Mouse   | TGGAGAGCAGCCTTGAAATC     | GTCAGACATGGAGTTGGAGAAG |
| <i>Krt15</i> | Mouse   | GCTGGTATTGGTGTGACAGAGAAG | CCTGCACCAGACACTTAGATTT |
| <i>Lrig1</i> | Mouse   | GAACACCTGAACCTTGGAGAG    | CTGCAGCATCCTACCCATTAG  |
| <i>Prom2</i> | Mouse   | CACCATCCATGAACCTATCCTATC | CAGGTGCTTATCCAGGTCATAC |
| <i>Smoc2</i> | Mouse   | TCGGCAGAACAAGACCAATAA    | CTAGCACACACCAGCAGTATC  |

#### *Western Blot*

Protein lysis was performed using RIPA buffer supplemented with protease and phosphatase inhibitors. Proteins were separated by SDS-PAGE electrophoresis and transferred to PVDF membrane. Membrane was blocked using Odyssey® Blocking buffer (LI-COR). Primary antibodies (K15 1:1000 (ab52816, Abcam), GAPDH 1:10000 (MAB374, EMD Millipore) were incubated overnight at 4°C and secondary antibodies 1h at room temperature. Western blots were revealed using the Odyssey® Infrared Imager (LI-COR).

### *3D organoid culture*

Epithelial cells were isolated from the mouse esophagus and 10,000 cells were seeded in 50µl Matrigel in 24-well plates. When sorted cells were used, 1,000 cells were seeded in 50µl Matrigel and passaged until a sufficient number of 3D organoids was obtained (n=4). After solidification, media (DMEM/F12, 1X Glutamax, 1X HEPES, 1X N2 Supplement, 1X B27 Supplement, 0.1mM N-Acetylcysteine, 50 ng/ml recombinant EGF, Noggin/R-Spondin conditioned media, 10µM Y27632) was added and replenished every 2-4 days. For human 3D organoids, cells were isolated from esophageal biopsies and 20,000 cells were seeded in 50µl Matrigel in 24-well plates. Media was as described before supplemented with 500nM A83-01, 10µM SB202190, 10nM Gastrin, 10mM Nicotiamide, 100ng/ml recombinant Wnt3a. For IHC or IF, 3D organoids were recovered from Matrigel with dispase digestion, fixed overnight in 4% paraformaldehyde (PFA) and embedded in 2% Bacto-Agar:2.5% gelatin. 3D organoids were grown for 7 to 10 days.

### *Human Samples*

Normal de-identified human esophageal biopsies were obtained under an approved Institutional Review Board protocol.

### *Statistics*

Values were presented as mean  $\pm$  SEM, except mentioned otherwise. Two-tailed Student's t-test was used to determine the statistical significance except mentioned otherwise. A value of  $p \leq 0.05$  was considered significant (\*). To compare KI67 positivity in *Krt15*<sup>+</sup> (GFP<sup>+</sup>) cells (Figure 3D), we performed a logistic regression. Odds Ratio/z-test was used to determine statistical significance and a value of  $p \leq 0.05$  was considered significant (\*). Wald chi-square test was also performed. To compare probability of having a KI67<sup>+</sup> cells in the *Krt15*<sup>+</sup> basal cells vs. the neighboring cells (Figure 3F), a repeated measures logistic regression was performed. Odds Ratios and z-test were performed following the regression. Also, chi-square test was performed to test the differences between each position. Clone counting was analyzed using binomial regression and chi-square test (Wald).

### *Study approval*

Animal studies were approved by the University of Pennsylvania Institutional Animal Care and Use Committee (IACUC), Philadelphia, USA. Human study was approved by the University of Pennsylvania Institutional Review Board (IRB), Philadelphia, USA. All subjects provided informed consent prior to their participation in the study.

## Supplemental References

- Kalabis, J., Oyama, K., Okawa, T., Nakagawa, H., Michaylira, C.Z., Stairs, D.B., Figueiredo, J.L., Mahmood, U., Diehl, J.A., Herlyn, M. & Rustgi, A.K. 2008, "A subpopulation of mouse esophageal basal cells has properties of stem cells with the capacity for self-renewal and lineage specification", *The Journal of clinical investigation*, vol. 118, no. 12, pp. 3860-3869.
- Kalabis, J., Wong, G.S., Vega, M.E., Natsuizaka, M., Robertson, E.S., Herlyn, M., Nakagawa, H. & Rustgi, A.K. 2012, "Isolation and characterization of mouse and human esophageal epithelial cells in 3D organotypic culture", *Nature protocols*, vol. 7, no. 2, pp. 235-246.
- Long, A., Giroux, V., Whelan, K.A., Hamilton, K.E., Tetreault, M.P., Tanaka, K., Lee, J.S., Klein-Szanto, A.J., Nakagawa, H. & Rustgi, A.K. 2015, "WNT10A promotes an invasive and self-renewing phenotype in esophageal squamous cell carcinoma", *Carcinogenesis*, vol. 36, no. 5, pp. 598-606.
